# Supplementary material for: Surface networks in the Arctic may miss a future "methane bomb"
Source: Copernicus journal article supplement (doi:10.5194/egusphere-2023-2308), 2023-11-10
Supplement: Supplementary file 1 [file egusphere-2023-2308-supplement.pdf]

# Surface networks in the Arctic may miss a future "methane bomb"

Sophie Wittig<sup>1,\*</sup>, Antoine Berchet<sup>1</sup>, Isabelle Pison<sup>1</sup>, Marielle Saunois<sup>1</sup>, and Jean-Daniel Paris<sup>1</sup>

<sup>1</sup>Laboratoire des Sciences du Climat et de l'Environnement, CEA-CNRS-UVSQ, Gif-sur-Yvette, France

\*Now at the Department of Meteorology and Geophysics, University of Vienna, Vienna, Austria

**Correspondence:** antoine.berchet@lscce.ipsl.fr

Table S1: *Selected atmospheric observation sites for this study, by decreasing latitudes.*

| <b>ID</b> | <b>Site, country</b>  | <b>Latitude</b> | <b>Longitude</b> | <b>Elevation (masl)</b> | <b>Operator</b>  |
|-----------|-----------------------|-----------------|------------------|-------------------------|------------------|
| ALT       | Alert, CAN            | 82.5 °N         | 62.5 °W          | 185                     | ECCC             |
| ZEP       | Zeppelin, NOR         | 78.9 °N         | 11.9 °E          | 474                     | NOAA-ESRL        |
| SUM       | Summit, GRL           | 72.6 °N         | 38.4 °E          | 3210                    | NOAA-ESRL        |
| TIK       | Tiksi, RUS            | 71.9 °N         | 128.9 °E         | 19                      | FMI/NOAA         |
| BRW       | Barrow, USA           | 71.3 °N         | 156.6 °W         | 11                      | NOAA-ESRL        |
| CBY       | Cambridge Bay, CAN    | 69.1 °N         | 105.1 °W         | 35                      | ECCC             |
| INK       | Inuvik, CAN           | 68.3 °N         | 133.5 °W         | 113                     | ECCC             |
| PAL       | Pallas, FIN           | 68.0 °N         | 24.1 °E          | 565                     | FMI/NOAA         |
| CRV       | CARVE, USA            | 65.0 °N         | 147.6 °W         | 611                     | NOAA-ESRL        |
| BLK       | Baker Lake, CAN       | 64.3 °N         | 96.0 °W          | 95                      | ECCC             |
| NOY       | Noyabrsk, RUS         | 63.4 °N         | 75.8 °E          | 100                     | JR-stations NIES |
| ICE       | Storhovdi Island, ISL | 63.4 °N         | 20.2 °E          | 118                     | NOAA-ESR         |
| IGR       | Igrim, RUS            | 63.2 °N         | 64.4 °E          | 25                      | JR-stations NIES |
| BCK       | Behchoko, CAN         | 62.8 °N         | 115.9 °W         | 160                     | ECCC             |
| YAK       | Yakutsk, RUS          | 62.1 °N         | 129.4 °E         | 130                     | JR-stations NIES |
| DEM       | Demyanskoe, RUS       | 59.8 °N         | 70.9 °E          | 75                      | JR-stations NIES |
| FNE       | Fort Nelson, CAN      | 58.8 °N         | 122.6 °W         | 361                     | ECCC             |
| CHU       | Churchill, CAN        | 58.7 °N         | 93.8 °W          | 29                      | ECCC             |
| KRS       | Karasevoe, RUS        | 58.3 °N         | 82.4 °E          | 50                      | JR-stations NIES |
| BRZ       | Berezorechka, RUS     | 56.1 °N         | 112.5 °E         | 150                     | JR-stations NIES |
| CBA       | Cold Bay, USA         | 55.2 °N         | 162.7 ° E        | 21                      | NOAA-ESRL        |
| LLB       | Lac La Biche, CAN     | 55.0 °N         | 112.5 °W         | 540                     | ECCC             |
| AZV       | Azovo, RUS            | 54.7 °N         | 73.0 °E          | 100                     | JR-stations NIES |
| VGN       | Vaganovo, RUS         | 54.5 °N         | 62.3 °E          | 200                     | JR-stations NIES |
| ETL       | East Trout Lake, CAN  | 54.3 °N         | 105.0 °W         | 500                     | ECCC             |
| MHD       | Mace Head, IRL        | 53.3 °N         | 9.9 °W           | 5                       | NOAA-ESRL        |
| SHM       | Shemya Island, USA    | 52.7 °N         | 174.1 °W         | 23                      | NOAA-ESRL        |
| EST       | Esther, CAN           | 51.7 °N         | 110.2 °W         | 707                     | ECCC             |
| SVV       | Savvushka, RUS        | 51.3 °N         | 82.1 °E          | 400                     | JR-stations NIES |
| BRA       | Bratt's Lake, CAN     | 50.2 °N         | 104.7 °W         | 595                     | ECCC             |
| FRD       | Fraserdale, CAN       | 49.9 °N         | 81.6 °W          | 210                     | ECCC             |

|     |                     |         |          |     |      |
|-----|---------------------|---------|----------|-----|------|
| CPS | Chapais, CAN        | 49.8 °N | 75.0 °W  | 391 | ECCC |
| CHB | Chibougamau, CAN    | 49.7 °N | 74.3 °W  | 393 | ECCC |
| ESP | Estevan Point, CAN  | 49.4 °N | 126.5 °W | 7   | ECCC |
| ABT | Abbotsford, CAN     | 49.0 °N | 122.3 °W | 40  | ECCC |
| EGB | Egbert, CAN         | 44.2 °N | 79.8 °W  | 251 | ECCC |
| WSA | Sable Island, CAN   | 43.9 °N | 60.0 °W  | 5   | ECCC |
| DWN | Downsview, CAN      | 43.8 °N | 79.5 °W  | 198 | ECCC |
| HNP | Hanlan's Point, CAN | 43.6 °N | 79.4 °W  | 87  | ECCC |
| TKP | Turkey Point, CAN   | 42.6 °N | 80.6 °W  | 231 | ECCC |

Table S2: Additional observation sites.

| <b>ID</b> | <b>Site, country</b>      | <b>Latitude</b> | <b>Longitude</b> | <b>Elevation (masl)</b> | <b>Operator</b>   |
|-----------|---------------------------|-----------------|------------------|-------------------------|-------------------|
| SNO       | Station Nord, GRL         | 81.6 °N         | 16.7 °W          | 8                       | ICOS              |
| KJN       | Kjølnes, NOR              | 70.9 °N         | 29.2 °E          | 30                      | Univ. Exeter/ICOS |
| AMB       | Ambarchik, RUS            | 69.6 °N         | 162.3 °E         | 5                       | MPI-BGC           |
| TER       | Teriberka, RUS            | 69.2 °N         | 35.1 °E          | 83                      | MGO               |
| CHS       | Cherskii, RUS             | 68.6 °N         | 161.3 °E         | 23                      | IASOA             |
| SOD       | Sodankyla, FIN            | 67.4 °N         | 26.6 °E          | 227                     | ICOS              |
| SVB       | Svartberget, SWE          | 64.3 °N         | 19.8 °E          | 275                     | ICOS              |
| SMR       | Hyytiälä, FIN             | 61.9 °N         | 24.3 °E          | 181                     | ICOS              |
| ZOT       | Zotto, RUS                | 60.8 °N         | 89.4 °E          | 104                     | MPI-BGC           |
| NOR       | Norunda, SWE              | 60.1 °N         | 17.5 °E          | 46                      | ICOS              |
| UTO       | Utö, FIN                  | 59.8 °N         | 21.4 °E          | 65                      | ICOS              |
| BIR       | Birkenes Observatory, NOR | 58.4 °N         | 8.3 °E           | 219                     | ICOS              |
| HTM       | Hyltemossa, SWE           | 56.1 °N         | 13.4 °E          | 255                     | ICOS              |
| VHL       | Vavihill, SWE             | 56.0 °N         | 13.2 °E          | 175                     | PSI               |
| PLA       | Preila, LTU               | 55.4 °N         | 21.1 °E          | 5                       | FTMC              |
| CDL       | Candle Lake, CAN          | 55.4 °N         | 105.1 °E         | 600                     | ECCC              |

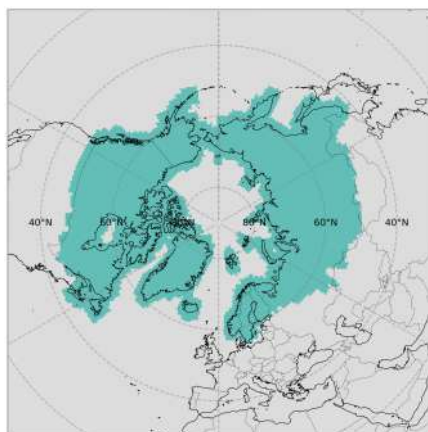

(a) Entire Region

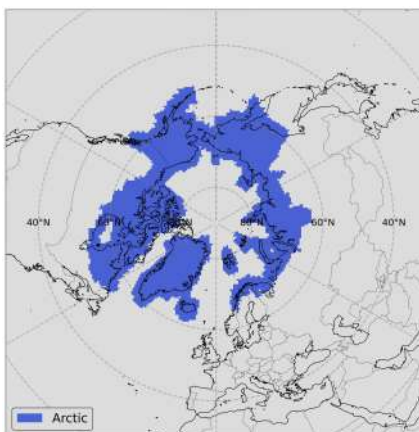

(b) Arctic

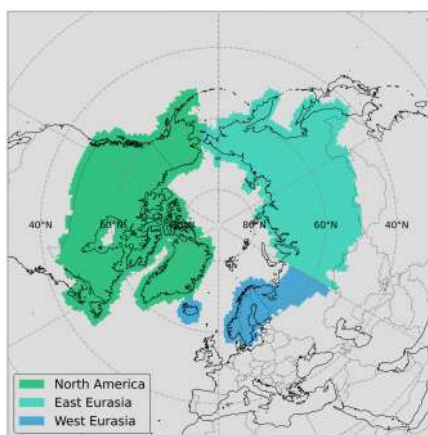

(c) Sub-continental regions

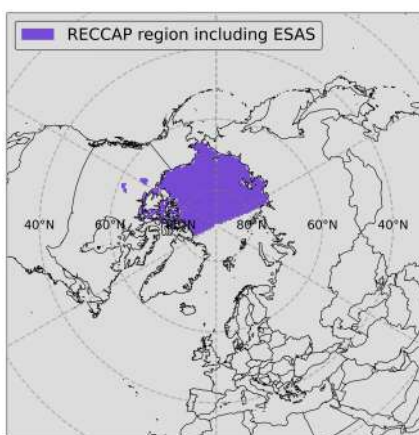

(d) Region including ESAS

**Figure S1.** *Supra-regions (figures a to c) used for applying trends on wetland and anthropogenic CH<sub>4</sub> emissions and RECCAP region including the ESAS (figure d) used for applying trends on oceanic methane sources.*
